# Supplementary material for: Association between Cerebral Infarction Risk and Medication Adherence in Atrial Fibrillation Patients Taking Direct Oral Anticoagulants
Source: MDPI journal article supplement (doi:10.3390/healthcare9101313), 2021-10-01
Supplement: s1 [file s1]

Table S1 The period during which data was collected from each hospital.

| Hospitals (belonging to the National<br>Hospital Organization) | Cerebral infarction group | Control group                      |
|----------------------------------------------------------------|---------------------------|------------------------------------|
| Yokohama Medical Center                                        | From Sep 2018 to Feb 2020 | Sep and Oct 2018, Jan and Feb 2019 |
| Sagamihara Hospital                                            | From Oct 2018 to Feb 2020 | Oct and Nov 2018, Jan and Feb 2019 |
| Mito Medical Center                                            | From Sep 2018 to Feb 2020 | Sep and Oct 2018, Jan and Feb 2019 |
| Tokyo Medical Center                                           | From Sep 2018 to Feb 2020 | Sep and Oct 2018, Jan and Feb 2019 |
| Tochigi Medical Center                                         | From Oct 2018 to Feb 2020 | Oct and Nov 2018, Jan and Feb 2019 |
| Utsunomiya Hospital                                            | From Jul 2019 to Feb 2020 | Jul and Aug 2019                   |
| Shinshu Ueda Medical Center                                    | From Jul 2019 to Feb 2020 | Jul and Aug 2019                   |
